# Supplementary material for: [Documentation of decisions to withhold or withdraw life-sustaining therapies : Recommendation of the Ethics Section of the German Interdisciplinary Association of Critical Care and Emergency Medicine (DIVI) in collaboration with the Ethics Section of the German Society for Medical Intensive Care and Emergency Medicine (DGIIN)].
Source: Springer Nature journal article supplement (doi:10.1007/s00063-017-0321-x), 2017-09-01
Supplement: MOESM1 [file 63_2017_321_MOESM1_ESM.docx]

Patientenetikett

**Datum:**

**Gültig
maximal bis:**

**(Gültigkeit erlischt mit der Entlassung aus dem Krankenhaus)**

**➊ Folgende Maßnahmen werden *nicht* durchgeführt*:**

**Reanimation:**

- Herzdruckmassage
- Defibrillation / Kardioversion
- Medikamente
- Assist Devices

**Beatmung:**

- Invasiv
- Nicht-invasiv (Maskenbeatmung)
- Intensivierung der Beatmung
- Lungenersatzverfahren (z.B. ECMO)

**❒ Verlegung Intensiv/IMC/andere Klinik**

**Künstliche Ernährung:**

- Enteral (Sondenkost)
- Parenteral

**Andere:**

- Antiinfektive Therapie (z. B. Antibiotika)
- Andere Medikamente (unter Besonderheiten benennen)
- Blutprodukte
- Nierenersatzverfahren (z.B. Dialyse)
- Operative / diagnostische Maßnahmen
- Passagerer Schrittmacher
- Weitere:

**Besonderheiten:**

**➋ Grund für die Begrenzung der Maßnahmen**

- **Medizinische Indikation nicht gegeben**
  (Therapie führt wegen schlechter Gesamtprognose nicht zum Erreichen des angestrebten Therapieziels oder Sterbephase hat begonnen)
- **Therapiebegrenzung auf Grund des Patientenwillens**
  (Aussage kann von Patient/in jederzeit ohne Angabe von Gründen formlos widerrufen werden)

**Erläuterung zum Patientenwillen:**

- Patient/in kann eigene Situation erfassen und die Folgen der Therapiebegrenzung verstehen
- Patientenwille wurde durch Betreuer oder Bevollmächtigten zur Geltung gebracht

**Patientenwille gesichert auf Basis von**:

- Patientenverfügung
- Behandlungswünschen
- Mutmaßlichem Patientenwillen

**Besonderheiten:**

**Informationsgespräch erfolgte** am:

am:

am:

am: ❑ mit Patient/in

❑ mit Betreuer/ Vorsorge-Bevollmächtigtem

❑ mit Pflegekraft

❑ mit Angehörigen u. sonstigen Vertrauenspersonen, nämlich:

**➌ Autorisierung**

**[Unterschrift Ärztin/Arzt Name in Druckbuchstaben]**

**[*Zur Kenntnis genommen* Unterschrift der/des Pflegenden Name in Druckbuchstaben]**
